# Supplementary material for: Glycemic Control Is Associated with Histological Findings of Nonalcoholic Fatty Liver Disease
Source: PubMed Central journal article supplement — Diabetes Metab J. 2024 Feb 2;48(3):440–8. doi: 10.4093/dmj.2023.0200 (PMC11140399; doi:10.4093/dmj.2023.0200), 2024-02-02
Supplement: dmj-2023-0200-Supplementary-Table-1.pdf [file dmj-2023-0200-Supplementary-Table-1.pdf]

**Supplementary Table 1.** Patient characteristics according to histological findings

| Characteristic          | Fibrosis stage (0–2)<br>(n=197) | Fibrosis stage (3–4)<br>(n=134) | P value            | NAS (1–4)<br>(n=156) | NAS (5–8)<br>(n=175) | P value           |
|-------------------------|---------------------------------|---------------------------------|--------------------|----------------------|----------------------|-------------------|
| Age, yr                 | 54 (39–64)                      | 63 (54.8–69)                    | <0.01              | 60 (46.5–68.8)       | 58 (46–66)           | 0.36              |
| Male sex, %             | 47.7                            | 34.3                            | 0.02 <sup>b</sup>  | 44.2                 | 40.6                 | 0.50 <sup>b</sup> |
| BMI, kg/m <sup>2</sup>  | 26.4 (23.9–29.7)                | 28.2 (24.5–31.0)                | 0.03               | 26.3 (23.2–29.5)     | 27.7 (24.9–31.1)     | <0.01             |
| Hemoglobin, g/L         | 146 (135–154.5)                 | 142 (130–151)                   | 0.04               | 141 (131–151.8)      | 146 (135–154)        | 0.07              |
| ALT, IU/L               | 62 (37–104)                     | 60 (36.8–96.8)                  | 0.41               | 41.5 (28.3–63)       | 88 (56–126)          | <0.01             |
| UA, μmol/L              | 363 (300–416)                   | 339 (278–393)                   | 0.01               | 342 (286–393)        | 363 (303–416)        | 0.03              |
| Creatinine, μmol/L      | 61.9 (51.3–72.5)                | 56.6 (51.9–67.6)                | 0.11               | 61.9 (52.4–71.6)     | 58.3 (51.3–70.7)     | 0.37              |
| TC, mmol/L              | 5.12 (4.54–5.79)                | 4.90 (4.22–5.48)                | <0.01 <sup>a</sup> | 4.91 (4.29–5.81)     | 5.12 (4.50–5.66)     | 0.23 <sup>a</sup> |
| TG, mmol/L              | 1.48 (1.12–1.96)                | 1.35 (0.99–1.93)                | 0.06               | 1.33 (0.97–1.75)     | 1.54 (1.12–2.10)     | <0.01             |
| HbA1c, %                | 6.1 (5.6–7.2)                   | 6.5 (6.0–7.6)                   | <0.01              | 6.2 (5.6–7.2)        | 6.3 (5.9–7.6)        | 0.03              |
| DM, %                   | 41.6                            | 67.9                            | <0.01 <sup>b</sup> | 48.7                 | 55.4                 | 0.22 <sup>b</sup> |
| Fibrosis stage (3–4), % |                                 |                                 |                    | 34.6                 | 45.7                 | 0.04 <sup>b</sup> |
| NAS (5–8), %            | 48.2                            | 59.7                            | 0.04 <sup>b</sup>  |                      |                      |                   |

Values are presented as median (interquartile range) or percentage.

To evaluate between-group differences, the Mann-Whitney *U* test or <sup>a</sup>unpaired *t*-test was used for continuous variables, <sup>b</sup>Chi-square test was used for categorical variables. *P*<0.05 was considered significant.

NAS, NAFLD activity score; BMI, body mass index; ALT, alanine aminotransferase; UA, uric acid; TC, total cholesterol; TG, triglyceride; HbA1c, glycosylated hemoglobin; DM, diabetes mellitus.
