# Supplementary material for: Glycemic Control Is Associated with Histological Findings of Nonalcoholic Fatty Liver Disease
Source: PubMed Central journal article supplement — Diabetes Metab J. 2024 Feb 2;48(3):440–8. doi: 10.4093/dmj.2023.0200 (PMC11140399; doi:10.4093/dmj.2023.0200), 2024-02-02
Supplement: dmj-2023-0200-Supplementary-Table-2.pdf [file dmj-2023-0200-Supplementary-Table-2.pdf]

**Supplementary Table 2.** Association between HbA1c level at the time of diagnosis and advanced fibrosis (fibrosis stage 3–4) in patients not using pioglitazone, glucagon-like peptide-1 receptor agonist, or sodium-glucose transport protein 2 inhibitor

| Variable             | HbA1c                 |                                 |                                  |                                  |
|----------------------|-----------------------|---------------------------------|----------------------------------|----------------------------------|
|                      | ≤5.4% ( <i>n</i> =41) | 5.5%–6.4% ( <i>n</i> =140)      | 6.5%–7.4% ( <i>n</i> =58)        | ≥7.5% ( <i>n</i> =66)            |
| Crude OR (95% CI)    | 1.00                  | 2.78 (1.21–7.25) <i>P</i> =0.02 | 6.41 (2.55–17.96) <i>P</i> <0.01 | 4.05 (1.64–11.13) <i>P</i> <0.01 |
| Adjusted OR (95% CI) |                       |                                 |                                  |                                  |
| Model 1              | 1.00                  | 1.47 (0.55–3.93) <i>P</i> =0.43 | 2.88 (1.00–8.33) <i>P</i> =0.04  | 2.35 (0.84–6.59) <i>P</i> =0.10  |
| Model 2              | 1.00                  | 2.84 (1.12–7.18) <i>P</i> =0.02 | 5.66 (2.04–15.68) <i>P</i> <0.01 | 3.05 (1.09–8.56) <i>P</i> =0.03  |

Differences were considered statistically significant at *P*<0.05. Model 1 was adjusted for age (years), sex, and hemoglobin (g/L), alanine aminotransferase (IU/L), and creatinine (μmol/L) levels. Model 2 was adjusted for body mass index (kg/m<sup>2</sup>) and uric acid (μmol/L), total cholesterol (mmol/L), and triglyceride (mmol/L) levels.

HbA1c, glycosylated hemoglobin; OR, odds ratio; CI, confidence interval.
