# Supplementary material for: Glycemic Control Is Associated with Histological Findings of Nonalcoholic Fatty Liver Disease
Source: PubMed Central journal article supplement — Diabetes Metab J. 2024 Feb 2;48(3):440–8. doi: 10.4093/dmj.2023.0200 (PMC11140399; doi:10.4093/dmj.2023.0200), 2024-02-02
Supplement: dmj-2023-0200-Supplementary-Table-3.pdf [file dmj-2023-0200-Supplementary-Table-3.pdf]

**Supplementary Table 3.** Association between HbA1c levels at the time of diagnosis and high NAS (5–8) in patients not using pioglitazone, glucagon-like peptide-1 receptor agonist, or sodium-glucose transport protein 2 inhibitor

| Variable             | HbA1c                 |                                 |                                  |                                  |
|----------------------|-----------------------|---------------------------------|----------------------------------|----------------------------------|
|                      | ≤5.4% ( <i>n</i> =41) | 5.5%–6.4% ( <i>n</i> =140)      | 6.5%–7.4% ( <i>n</i> =58)        | ≥7.5% ( <i>n</i> =66)            |
| Crude OR (95% CI)    | 1.00                  | 4.01 (1.88–9.21) <i>P</i> <0.01 | 4.09 (1.74–10.26) <i>P</i> <0.01 | 4.48 (1.94–11.05) <i>P</i> <0.01 |
| Adjusted OR (95% CI) |                       |                                 |                                  |                                  |
| Model 1              | 1.00                  | 2.85 (1.02–7.92) <i>P</i> =0.04 | 3.67 (1.18–11.40) <i>P</i> =0.02 | 4.07 (1.36–12.14) <i>P</i> =0.01 |
| Model 2              | 1.00                  | 3.57 (1.56–8.16) <i>P</i> <0.01 | 3.32 (1.30–8.49) <i>P</i> <0.01  | 3.26 (1.26–8.45) <i>P</i> =0.01  |

Differences were considered statistically significant at *P*<0.05. Model 1 was adjusted for age (years), sex, and hemoglobin (g/L), alanine aminotransferase (U/L), and creatinine (μmol/L) levels. Model 2 was adjusted for body mass index (kg/m<sup>2</sup>) and uric acid (μmol/L), total cholesterol (mmol/L), and triglyceride (mmol/L) levels.

HbA1c, glycosylated hemoglobin; NAS, NAFLD activity score; OR, odds ratio; CI, confidence interval.
